# Supplementary material for: Effective control of early Zika virus replication by Dengue immunity is associated to the length of time between the 2 infections but not mediated by antibodies
Source: PubMed Central journal article supplement (PMC7255596; doi:10.1371/journal.pntd.0008285), 2020-05-28

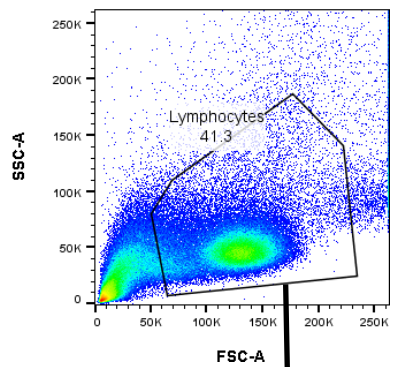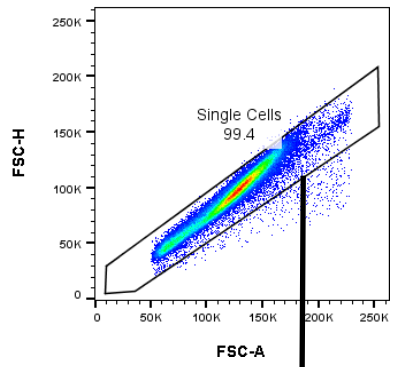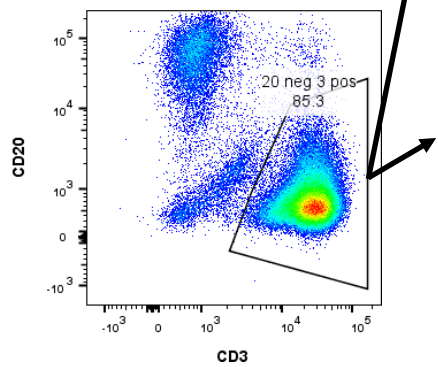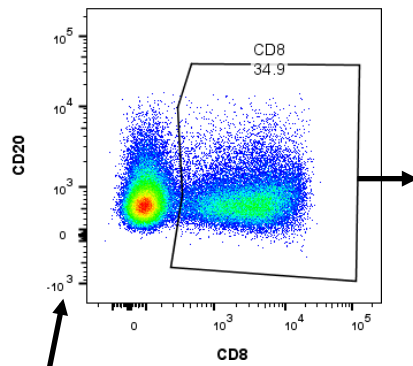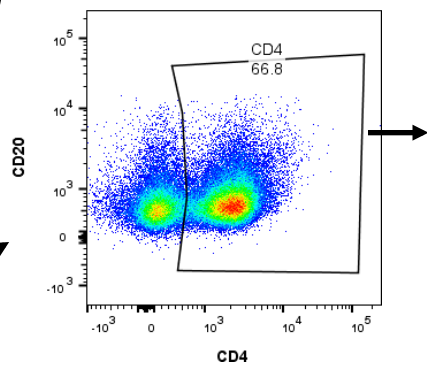

**Stimulated**

**Unstimulated**

**Stimulated**

**Unstimulated**

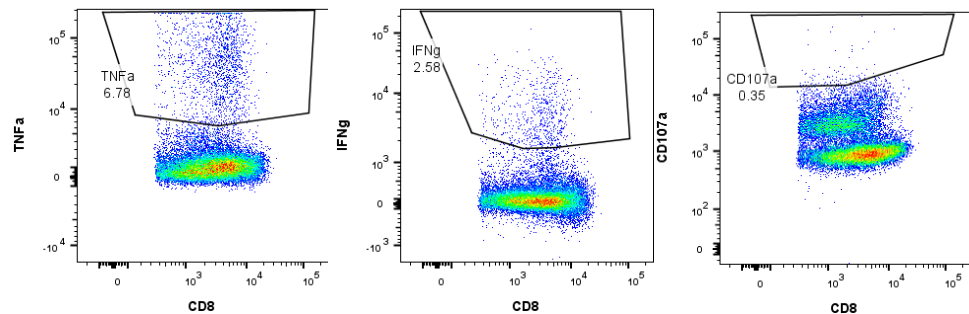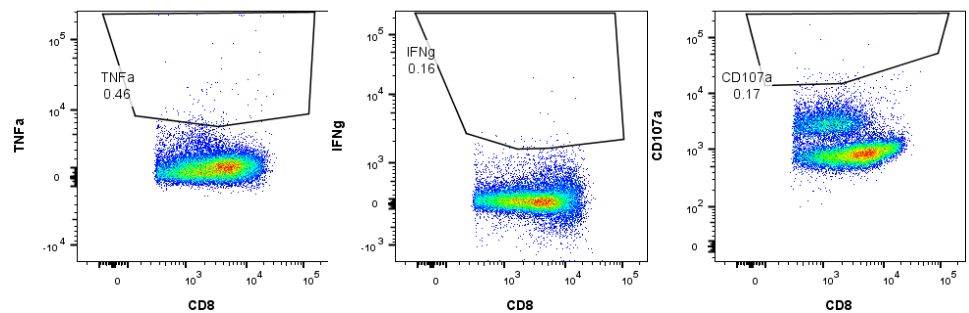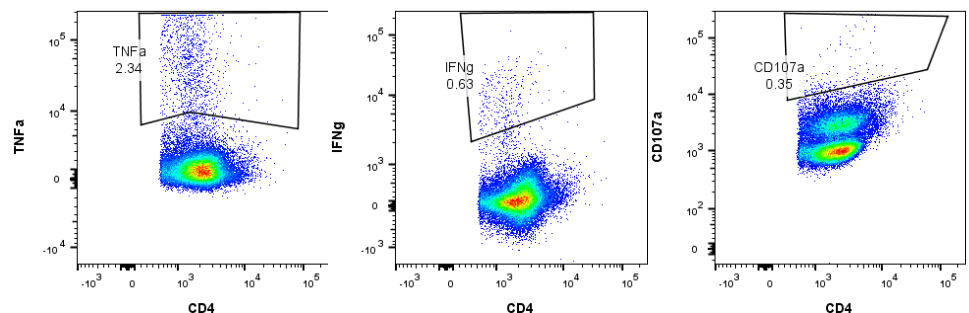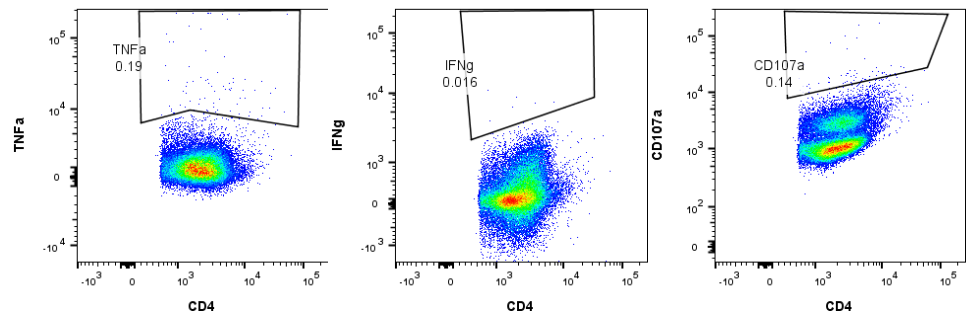

Supplement: pntd.0008285.s007.pdf [file pntd.0008285.s007.pdf]
